# Supplementary material for: Idiopathic normal pressure hydrocephalus
Source: HighWire-hosted journal article supplement (doi:10.1136/bmj.i3974), 2016-08-17
Supplement: bmj.i3974.pdf [file bmj.i3974.pdf]

## 易误诊?

## 特发性正常压力脑积水

Easily missed?

## Idiopathic normal pressure hydrocephalus

来源:BMJ 2016;354:i3974 doi: 10.1136/bmj.i3974

一位74岁老年男性主诉存在平衡和行走问题1年。他的家人说他越来越健忘,而且最近出现尿失禁。他被转诊到神经科,做了头颅计算机断层扫描(CT),提示脑室扩张而脑回未见明显萎缩,表现符合正常压力脑积水。

## 什么是特发性正常压力脑积水?

特发性正常压力脑积水存在特征性三联征:步态与平衡功能损害、认知功能损害和尿失禁。上述症状隐匿进展,病程至少超过3个月。存在脑室扩张而没有脑脊液压力的显著升高。正常压力脑积水可能继发于多种病因,例如,蛛网膜下腔出血、脑膜炎或创伤性脑损伤等<sup>1</sup>。关于特发性正常压力脑积水的发病机制存在广泛讨论,目前没有单一的理论得到公认。

## 为什么被误诊?

该病的研究多为病例报道和小型前瞻性研究,结果显示此病作为老年人群运动功能减退相关步态问题的病因之一,经常被忽视<sup>2,5</sup>。该病症状的呈现方式和严重程度存在多样性。常常仅有三联征中的一种或两种症状最先表现出来<sup>1,6</sup>。这些症状很可能与老年人群的其他疾病相混淆,尤其是阿尔茨海默病、血管性痴呆、帕金森病和“帕金森叠加综合征”<sup>1,7</sup>。另外,患者可能存在合并症,包括阿尔茨海默病或皮下动脉硬化性脑病,从而使得确诊该病颇为困难。

## 特发性正常压力脑积水有多常见?

- 关于特发性正常压力脑积水的流行病学数据很少。现患率和发病率的统计数据都欠准确和不一致<sup>1,6</sup>。
- 常见于>60岁的人群<sup>1,6</sup>。一项回顾性的瑞典研究发现70~79岁人群中现患率是0.2%,而80~89岁的人群中现患率是5.4%<sup>2</sup>。
- 该病是老年人痴呆病因中极少数可逆转的病因之一。

## 你需要知道

- 如果患者的步态、平衡或认知能力和(或)尿失禁症状进行性加重超过3个月时要想到特发性正常压力脑积水的诊断。
- 转诊至神经科排除其他诊断和进行神经影像学检查。典型的神经影像学表现为脑室扩张而没有脑回明显萎缩。
- 分流术是主流的治疗手段,可以改善症状,尽管尚缺乏长期的数据。约十分之一的患者会出现硬膜下血肿、癫痫发作、脑内出血和感染的术后并发症。

## 为什么重要?

在引起痴呆的病因中,特发性正常压力脑积水是极少数可能逆转的病因之一。脑脊液分流术是主流的治疗手段<sup>1,6</sup>。一篇针对(3 063例)分流术后观察性数据进行分析的系统性综述表明,约71%的患者三联征中一个或多个症状得到改善<sup>9</sup>。然而,目前尚没有随机对照试验数据,大多数研究都是基于手术病例队列,评估预后或影像学改变。不同的研究在分流器插入、分流瓣膜类型以及结局评估标准方面存在差别,因此很难得到关于治疗结局的肯定结论。

该病的自然病程尚不明确,但是病例研究和专家观点表明如果不经手术治疗,症状将持续恶化,且症状持续时间越长,手术效果将越差。

## 如何诊断?

临床医生要清楚该病的常见表现,并且当只出现单一症状时,要将该病作为鉴别诊断,诊断常常依赖于此。总体的临床表现(见表1)伴随提示性的神经影像学表现,对于诊断也是必要的。

## 临床特点

基于医院研究的综合证据表明,在约60%的患者中,步态与平衡功能损害、认知功能损害和尿失禁

Aravindhan Baheerathan  
core medical trainee<sup>1</sup>,  
Devkishan Chauhan  
core medical trainee<sup>2</sup>,  
Louis Koizia  
specialist registrar in  
care of the elderly<sup>3</sup>,  
Hugh O'Neal  
care of the elderly  
consultant<sup>4</sup>

<sup>1</sup>Department of Neurology, University College Hospital, London WC1E 6AG, UK;

<sup>2</sup>Department of Medicine, Kingston Hospital, Kingston-Upon-Thames KT2 7QB, UK;

<sup>3</sup>Department of Medicine, Northwick Park Hospital, Harrow HA1 3UJ, UK;

<sup>4</sup>Care of the Elderly Department, Worthing Hospital, Worthing BN11 2DH, UK

Correspondence to:  
A Baheerathan  
a.baheerathan89@gmail.com

尹翔翔 译  
刘彩燕 校  
北京协和医院  
神经科

表1 诊断特发性正常压力脑积水的临床症状<sup>6</sup>

| 症状        | 特点                                                                                                 | 诊断价值                                    |
|-----------|----------------------------------------------------------------------------------------------------|-----------------------------------------|
| 步态和平衡功能损害 | 常常最早出现,是首要症状,被描述为“磁性步态”、“拖步”、“宽基底”患者几乎没有帕金森病的特征性症状——震颤、表情少、强直和手失用<br>临床查体可见宽基底步态、足部呈外旋姿势、沿躯干长轴转身困难 | 基于医院研究报道的综合证据表明,94%~100%的患者就诊时会有步态和平衡障碍 |
| 认知功能损害    | 注意力和短期记忆力损害、精神运动性迟缓<br>严重的皮层功能损害(如失语、失用、失认、遗忘)同时缺乏步态障碍<br>则提示其他皮层痴呆,如阿尔茨海默病                        | 认知功能损害似乎出现在78%~98%的患者中                  |
| 小便症状      | 常常是正常压力脑积水患者最后出现的症状,可表现为尿急、尿频(夜尿增多)或明确的失禁                                                          | 76%~83%的患者就诊时存在小便障碍                     |

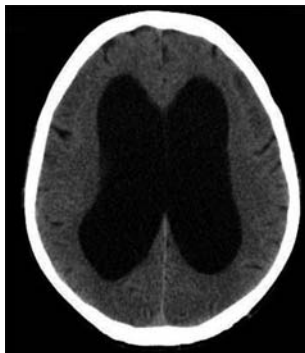

图1 脑计算机断层扫描(CT)可见脑室扩大的程度远远超过脑回萎缩的程度

的三联征症状会作为首发症状同时出现<sup>6</sup>。尚无公开发表的文献提示不同症状的阳性预测值及敏感性。

### 检查

对存在提示性症状的患者,下一步要进行脑CT或磁共振成像(MRI)检查。在正常压力脑积水患者中,脑室扩大的程度与脑回萎缩的程度明显不相称(图1)。其他特点包括

侧脑室颞角变宽和脑室周围低密度<sup>8,12</sup>。

正常压力脑积水的继发原因通过检查可予以明确。MRI在明确正常压力脑积水的脑结构改变方面敏感度更高<sup>1-12</sup>,因此术前常常行MRI检查。

特发性正常压力脑积水的诊断不能仅凭神经影像学的改变,因为健康老年人群中也会存在轻度脑积水和脑回变窄的表现。

### 如何治疗?

脑脊液分流术,特别是脑室-腹腔分流术,是主流的治疗方式<sup>16</sup>。

病例研究表明10例患者中约有1例会出现硬膜下血肿、癫痫发作、脑内出血和感染的术后并发症<sup>9</sup>。并且手术存在1%的病死率。极少数研究评估术后的长期预后。一项对55例特发性正常压力脑积水患者进行平均5.9年随访的回顾性研究发现,在分流术后,所有症状均得到明确改善,尽管接近一半的患者需要进行分流再调整<sup>13</sup>。

患者接受来自神经科和神经外科医生的共同管理。全科医生的每年随访应该询问运动能力、记忆和尿失禁症状是否稳定或改善。确保患者在社区得到很好的管理,并且得到当地的支持服务。

志谢、作者贡献等内容见网站bmj.com。

### 参考文献

- Malm J, Eklund A. Idiopathic normal pressure hydrocephalus. *Pract Neurol* 2006;6:14-27doi:10.1136/jnnp.2006.088351.
- Jaraj D, Rabiei K, Marlow T, Jensen C, Skoog I, Wikkelsø C. Prevalence of idiopathic normal-pressure hydrocephalus. *Neurology* 2014;82:1449-54. doi:10.1212/WNL.0000000000000342 pmid:24682964.
- Conn HO. Normal pressure hydrocephalus: a case report by a physician who is the patient. *Clin Med (Lond)* 2007;7:296-9. doi:10.7861/clinmedicine.7-3-296 pmid:17633954.
- Razay G, Wimmer M. Normal pressure hydrocephalus: Treatable dementia, missed diagnosis—the Launceston Prevalence Study. *Alzheimers Dement* 2013;9:P755doi:10.1016/j.jalz.2013.05.1530.
- Pradhan S, Bhan G. Normal pressure hydrocephalus: a difficult diagnosis. *Geriatric Medicine* 2008;10:589-92.
- Mori E, Ishikawa M, Kato T, et al. Japanese Society of Normal Pressure Hydrocephalus. Guidelines for management of idiopathic normal pressure hydrocephalus: second edition. *Neurol Med Chir (Tokyo)* 2012;52:775-809. doi:10.2176/nmc.52.775 pmid:23183074.
- Malm J, Graff-Radford NR, Ishikawa M, et al. Influence of comorbidities in idiopathic normal pressure hydrocephalus—research and clinical care. A report of the ISHCSF task force on comorbidities in INPH. *Fluids Barriers CNS* 2013;10:22. doi:10.1186/2045-8118-10-22 pmid:23758953.
- Shprecher D, Schwalb J, Kurlan R. Normal pressure hydrocephalus: diagnosis and treatment. *Curr Neurol Neurosci Rep* 2008;8:371-6. doi:10.1007/s11910-008-0058-2 pmid:18713572.
- Toma AK, Papadopoulos MC, Stapleton S, Kitchen ND, Watkins LD. Systematic review of the outcome of shunt surgery in idiopathic normal-pressure hydrocephalus. *Acta Neurochir (Wien)* 2013;155:1977-80. doi:10.1007/s00701-013-1835-5 pmid:23975646.
- Kiefer M, Unterberg A. The differential diagnosis and treatment of normal-pressure hydrocephalus. *Dtsch Arztebl Int* 2012;109:15-25, quiz 26.pmid:22282714.
- Williams MA, Relkin NR. Diagnosis and management of idiopathic normal-pressure hydrocephalus. *Neurol Clin Pract* 2013;3:375-85. doi:10.1212/CPJ.0b013e3182a78f6b pmid:24175154.
- Sasaki M, Yamashita F. [Neuroimaging of idiopathic normal pressure hydrocephalus—current concepts]. *Brain Nerve* 2008;60:241-5.pmid:18402071.
- Pujari S, Kharkar S, Metellus P, Shuck J, Williams MA, Rigamonti D. Normal pressure hydrocephalus: long-term outcome after shunt surgery. *J Neurol Neurosurg Psychiatry* 2008;79:1282-6. doi:10.1136/jnnp.2007.123620 pmid:18356257.

BMJ takes no responsibility for the accuracy of the translation from the published English language original and is not liable for any errors that may occur.
